# Supplementary material
Source: HighWire-hosted journal article supplement (https://jech.bmj.com/content/jech-2015-207051)
Supplement: inline-supplementary-material-2 [file inline-supplementary-material-2.pdf]

TITLE:

DATA:

FILE IS J:\1958\hbehaviours15\_09v8.dat;

VARIABLE:

NAMES ARE

IDGP health16 dis16 cog11 highqual4 srh4 employ23  
lsi23 malaise dvht23 dvht07 BMI23 ClassMenFinal  
ClassWomenFinal tenure ses23 famnetr a16\_totalscore  
a16\_divorce drinksix smok42\_1 sum\_sed sum\_modvig  
freqmodvidcat meetuk auditbin bmi overweightandobese  
whr\_women whr\_men phys23 smoke23 drink23 ESEPNew smoke16;

USEVARIABLES ARE

dvht07 health16 cog11 dis16 ESEPNew srh4  
a16\_divorce a16\_totalscore employ23 tenure famnetr  
lsi23 malaise BMI23 dvht23 ses23 smoke23  
drink23 smoke16 phys23 auditbin  
class2  
class3 class4 class5 class6  
edu2 edu3 edu4 edu5 ;

CATEGORICAL ARE

health16 auditbin srh4 employ23 lsi23 malaise  
tenure drink23 smoke23 phys23  
a16\_divorce  
edu2 edu3 edu4 edu5;

missing are health16 - smoke16 (9999);  
IDvar is IDGP;  
useobs ClassMenFinal < 9999;

DEFINE:

cut health16 (4);  
cut srh4 (2);  
cut employ23 (1);  
cut lsi23 (1);

If (ClassMenFinal eq 1) then class2 = 0;  
If (ClassMenFinal eq 2) then class2 = 1;  
If (ClassMenFinal eq 3) then class2 = 0;  
If (ClassMenFinal eq 4) then class2 = 0;  
If (ClassMenFinal eq 5) then class2 = 0;  
If (ClassMenFinal eq 6) then class2 = 0;

If (ClassMenFinal eq 1) then class3 = 0;  
If (ClassMenFinal eq 2) then class3 = 0;  
If (ClassMenFinal eq 3) then class3 = 1;  
If (ClassMenFinal eq 4) then class3 = 0;  
If (ClassMenFinal eq 5) then class3 = 0;  
If (ClassMenFinal eq 6) then class3 = 0;

If (ClassMenFinal eq 1) then class4 = 0;  
If (ClassMenFinal eq 2) then class4 = 0;  
If (ClassMenFinal eq 3) then class4 = 0;  
If (ClassMenFinal eq 4) then class4 = 1;  
If (ClassMenFinal eq 5) then class4 = 0;  
If (ClassMenFinal eq 6) then class4 = 0;

If (ClassMenFinal eq 1) then class5 = 0;  
If (ClassMenFinal eq 2) then class5 = 0;  
If (ClassMenFinal eq 3) then class5 = 0;  
If (ClassMenFinal eq 4) then class5 = 0;  
If (ClassMenFinal eq 5) then class5 = 1;  
If (ClassMenFinal eq 6) then class5 = 0;

If (ClassMenFinal eq 1) then class6 = 0;  
If (ClassMenFinal eq 2) then class6 = 0;  
If (ClassMenFinal eq 3) then class6 = 0;  
If (ClassMenFinal eq 4) then class6 = 0;  
If (ClassMenFinal eq 5) then class6 = 0;  
If (ClassMenFinal eq 6) then class6 = 1;

If (highqual4 eq 0) then edu2 = 0;  
If (highqual4 eq 1) then edu2 = 1;  
If (highqual4 eq 2) then edu2 = 0;  
If (highqual4 eq 3) then edu2 = 0;  
If (highqual4 eq 4) then edu2 = 0;

If (highqual4 eq 0) then edu3 = 0;  
If (highqual4 eq 1) then edu3 = 0;  
If (highqual4 eq 2) then edu3 = 1;  
If (highqual4 eq 3) then edu3 = 0;  
If (highqual4 eq 4) then edu3 = 0;

```
If (highqual4 eq 0) then edu4 = 0;
If (highqual4 eq 1) then edu4 = 0;
If (highqual4 eq 2) then edu4 = 0;
If (highqual4 eq 3) then edu4 = 1;
If (highqual4 eq 4) then edu4 = 0;
```

```
If (highqual4 eq 0) then edu5 = 0;
If (highqual4 eq 1) then edu5 = 0;
If (highqual4 eq 2) then edu5 = 0;
If (highqual4 eq 3) then edu5 = 0;
If (highqual4 eq 4) then edu5 = 1;
```

ANALYSIS:

```
TYPE is general;
ESTIMATOR IS mlr;
ITERATIONS = 10000000;
CONVERGENCE = 0.0005;
integration = montecarlo (100);
```

```
Processors = 4;
```

MODEL:

```
edu2 edu3 edu4 edu5 srh4 malaise lsi23 BMI23 drink23 on health16
esepnew dvht07 a16_divorce a16_totalscore
cog11 dis16 smoke16;
smoke23 employ23 ses23 tenure dvht23 employ23 famnetr on health16
esepnew dvht07 a16_divorce a16_totalscore
cog11 dis16 smoke16;
phys23 on health16
esepnew dvht07 a16_divorce a16_totalscore
cog11 dis16 smoke16;
health16 a16_totalscore dvht07 a16_divorce a16_totalscore on esepnew;
cog11 dis16 smoke16 on esepnew;
auditbin on class2
class3 class4 class5 class6
esepnew health16 dis16 dvht07 cog11 a16_totalscore
a16_divorce edu2 edu3 edu4 edu5 srh4 ses23 tenure
famnetr srh4 malaise employ23 lsi23 dvht23;
esepnew;
```

```
OUTPUT: Sampstat stand CINT PATTERNS TECH1 TECH8;
PLOT: TYPE is plot1;
```

PLOT: type is plot2;  
PLOT: type is plot3;

SAVEDATA:
